# Supplementary material
Source: PubMed Central journal article supplement (PMC9772289)
Supplement: NIHMS1853801-supplement-8.pdf [file NIHMS1853801-supplement-8.pdf]

## **Substrate Stiffness Enhances Human Regulatory T Cell Induction and Metabolism**

Lingting Shi<sup>a</sup>, Jee Yoon Lim<sup>b</sup>, Lance C. Kam<sup>a\*</sup>

- a. Department of Biomedical Engineering, Columbia University, 1210 Amsterdam Ave, New York, NY, 10027, USA
- b. Department of Biological Sciences, Columbia University, 1212 Amsterdam Ave, New York, NY, 10027, USA

\*Corresponding author: Lance C. Kam, 351 Engineering Terrace Mail Code 8904, New York, NY, 10027, USA, (212) 854-8725, [lance.kam@columbia.edu](mailto:lance.kam@columbia.edu)

## Supplementary Figures

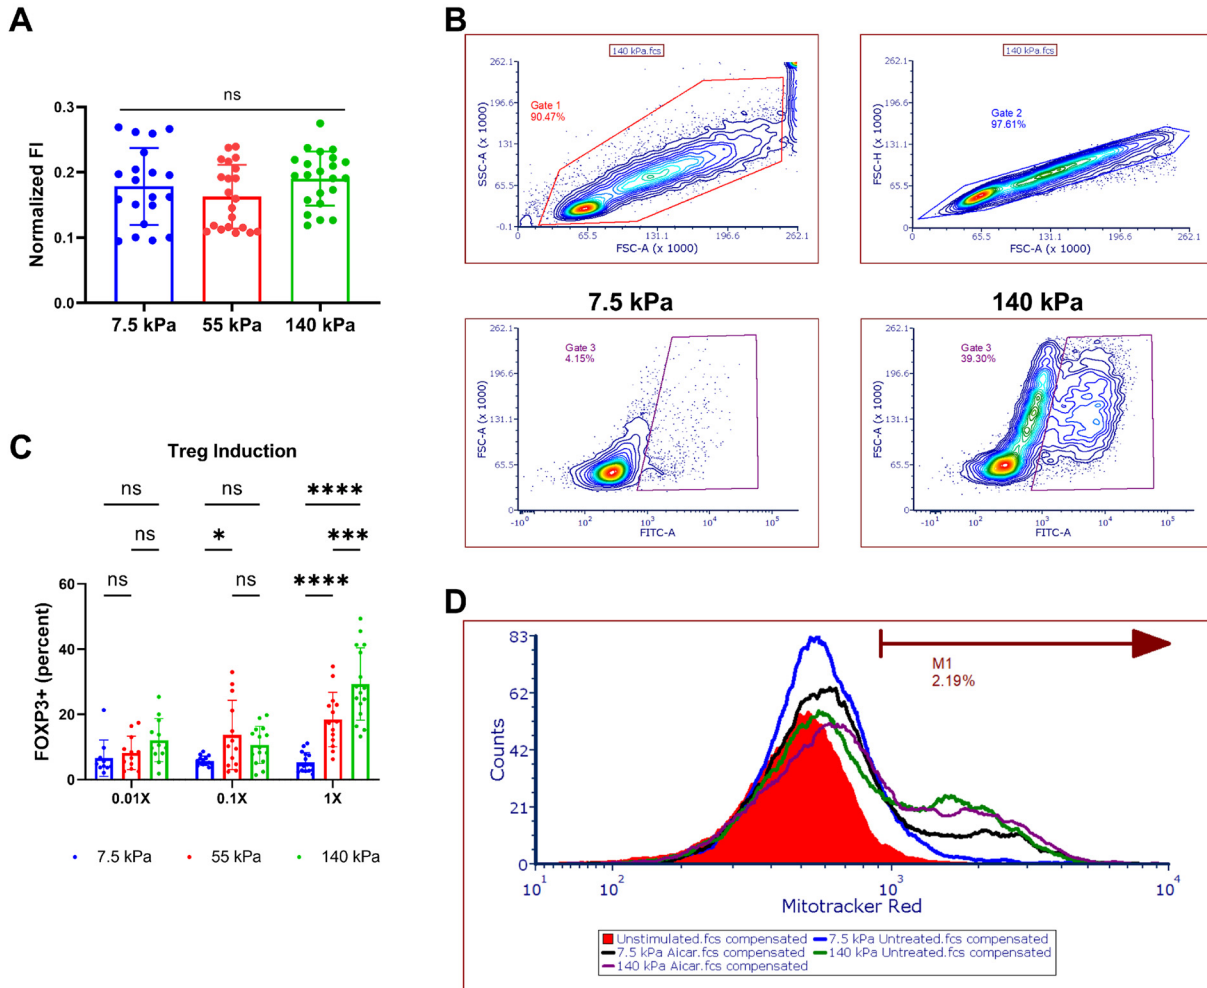

Figure S1. **(A)** Streptavidin-acrylamide concentrations were varied to obtain a similar coating of antibodies on PA-gels, and confirmed by fluorescence intensities on the surface of gels ( $n = 4$  gels for each formulation, Kruskal-Wallis test with Dunn's multiple comparisons). **(B)** Representative gating strategies for FXP3 expression from PA-gels. **(C)** Treg induction with various concentrations of streptavidin-acrylamide (4 independent experiments and 2 replicates each for 0.1X and 0.01X, two-way ANOVA with Tukey's multiple comparisons \*  $p < 0.05$ , \*\*\*  $p < 0.001$ , \*\*\*\*  $p < 0.0001$ ). **(D)** A representative gating strategy for percent mitochondrial high cells for Fig. 4.

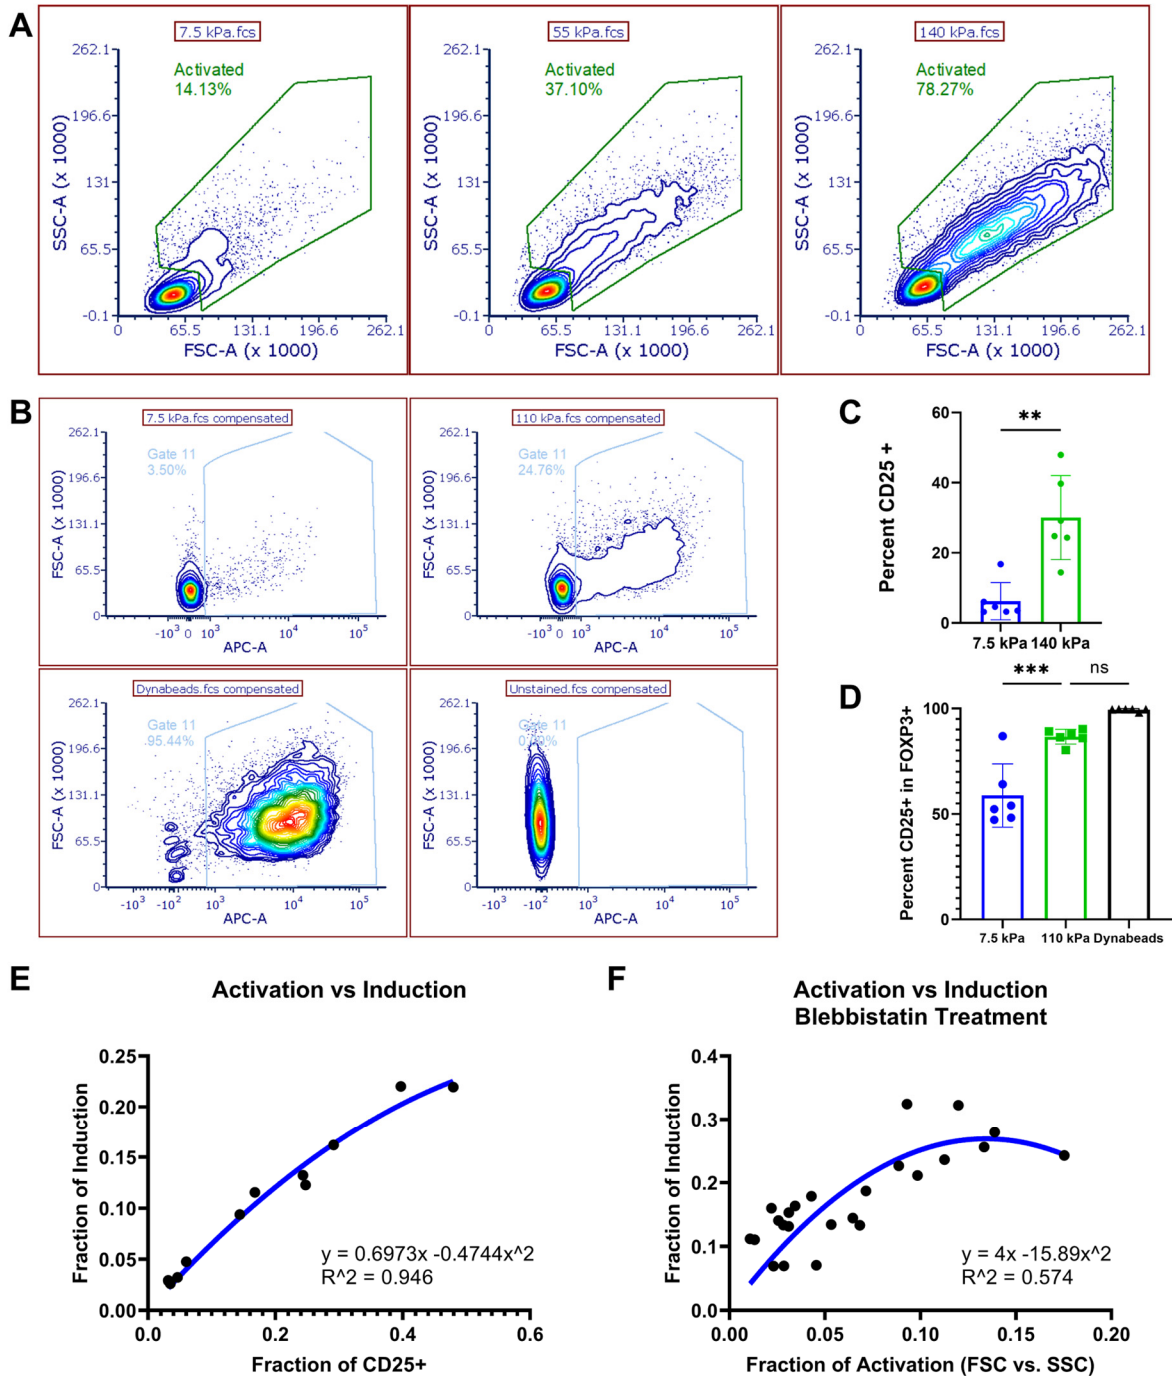

Figure S2. **(A)** Gating of activated T cells on the forward scattering and side scattering of flow cytometry data. **(B)** Representative flow gating strategy for CD25<sup>+</sup> population (APC-A, CD25). **(C)** Percent CD25<sup>+</sup> on both 7.5 kPa and 140 kPa (3 independent experiments and 2 replicates each, Mann-Whitney test, \*\*  $p < 0.01$ ). **(D)** Percent of CD25<sup>+</sup> population in FOXP3<sup>+</sup> population (3 independent experiments and 2 replicates each, One-way ANOVA, \*\*\*  $p < 0.001$ ). **(E)** Fraction of CD25<sup>+</sup> versus fraction of induction, measured as fraction of cells that are FOXP3<sup>+</sup>, (Extra sum-of-squares F test ( $\alpha = 0.05$ ), 3 independent experiments and 2 replicates each). **(F)** Activation vs induction of all the data from blebbistatin treatment and the second-order polynomial fit was identified with the Extra sum-of-squares F test ( $\alpha = 0.05$ ).

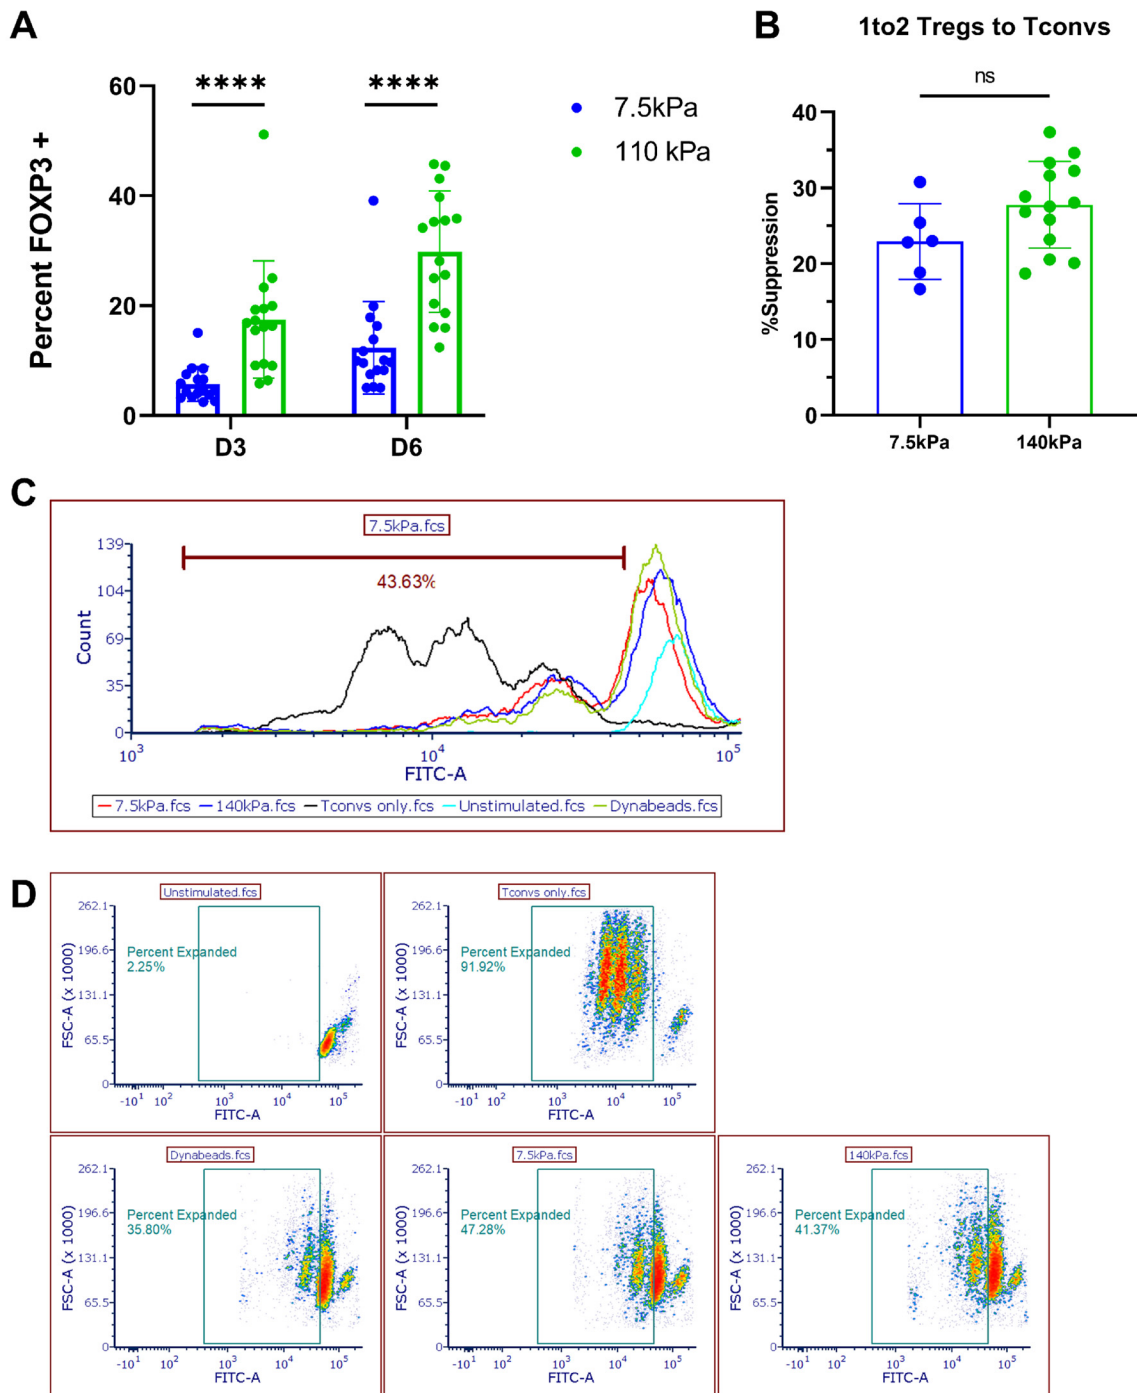

Figure S3. **(A)** Percent FOXP3<sup>+</sup> on day 6 (Mann-Whitney test was used to compare gels on day 3 and day 6 individually, \*\*\*\*  $p < 0.0001$ ). **(B)** Treg suppressive capacities with 1to2 ratio of Tregs to Tconvs ( $n = 5$  independent experiments, and the number of replicates depends on the number of cells obtained after sorting, unpaired  $t$ -test). **(C)** Representative gating strategies for calculation of percent suppression with a 1to1 ratio of Tregs to Tconvs samples. Tconvs only is the positive control without Tregs with Dynabeads. **(D)** Representative CFSE(FITC-A) vs FSC-A density plots for 1to1 ratio of Tregs to Tconvs samples.



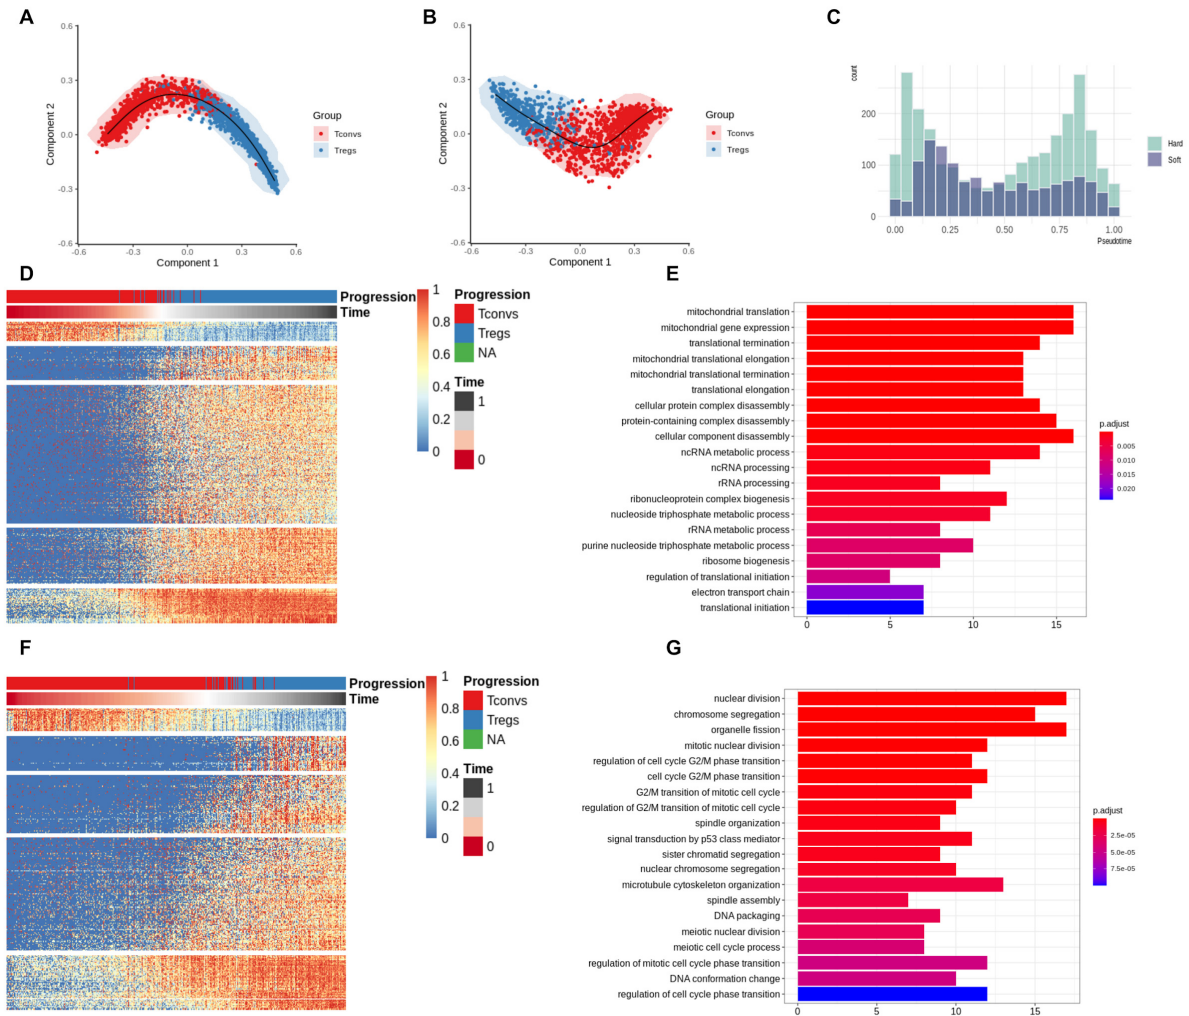

Figure S5. Trajectory analyses on either the hard or the soft samples. **(A, B)** Trajectory analyses were performed with SCORPIUS with T cells from either the hard **(A)** or the soft **(B)** sample separately. **(C)** Histogram of cells along the trajectory on either the hard or the soft sample. **(D, F)** Important genes that contribute to Treg induction were organized into modules for either the hard **(D)** or the soft **(F)** sample. **(E, G)** Over-representation analysis of genes uniquely identified in either the hard **(E)** or the soft **(G)** sample.

**A**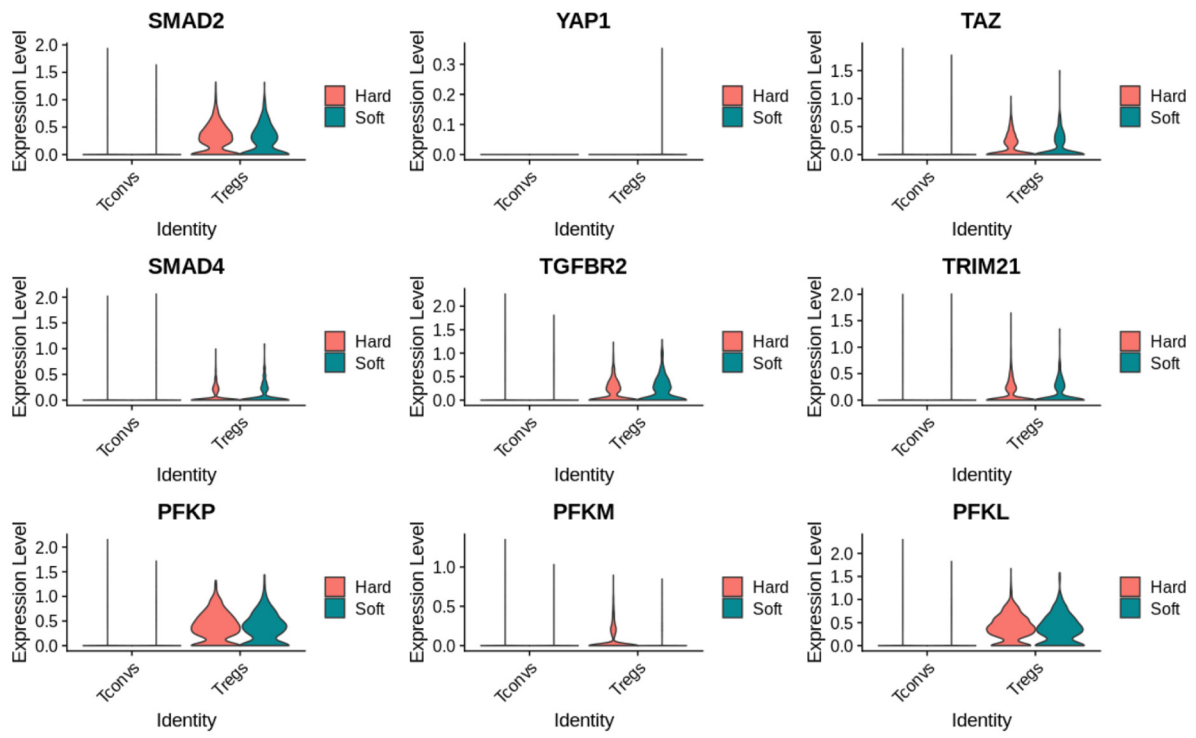

Figure S6. (A) Violin plots of SMAD2, YAP1, TAZ, SMAD4, TGFBR2, TRIM21, PFKP, PFKM, and PFKL.
